# Supplementary material for: Psychometric Validation of a General Health Quality of Life Tool for Cats Used to Compare Healthy Cats and Cats with Chronic Kidney Disease
Source: PubMed Central journal article supplement — J Vet Intern Med. 2015 Nov 14;30(1):183–91. doi: 10.1111/jvim.13656 (PMC4913638; doi:10.1111/jvim.13656), 2015-11-14
Supplement: JVIM-30-183-s001.pdf [file JVIM-30-183-s001.pdf]

# GHQ2 - Pain

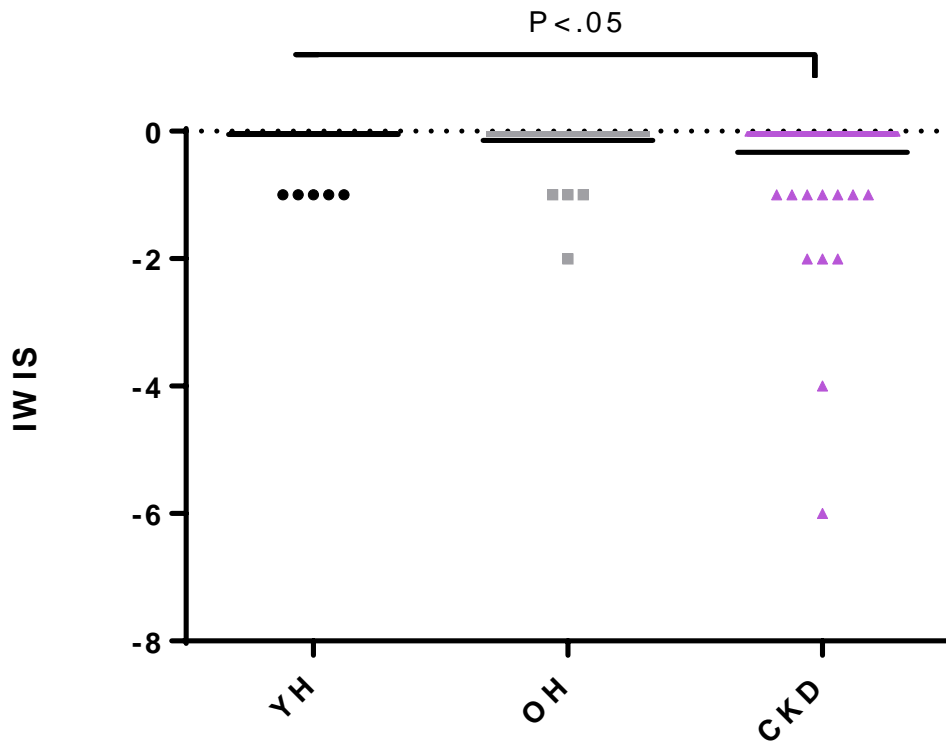

# GHQ 5 - Mobility

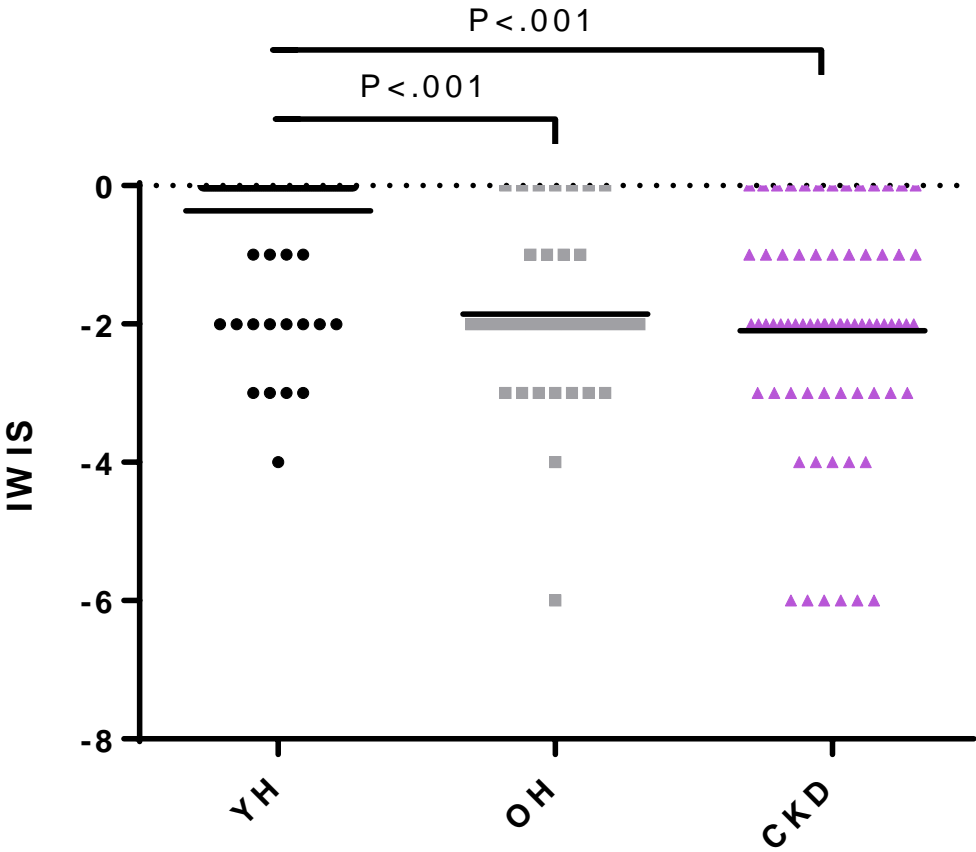

# GHQ6 - Stools

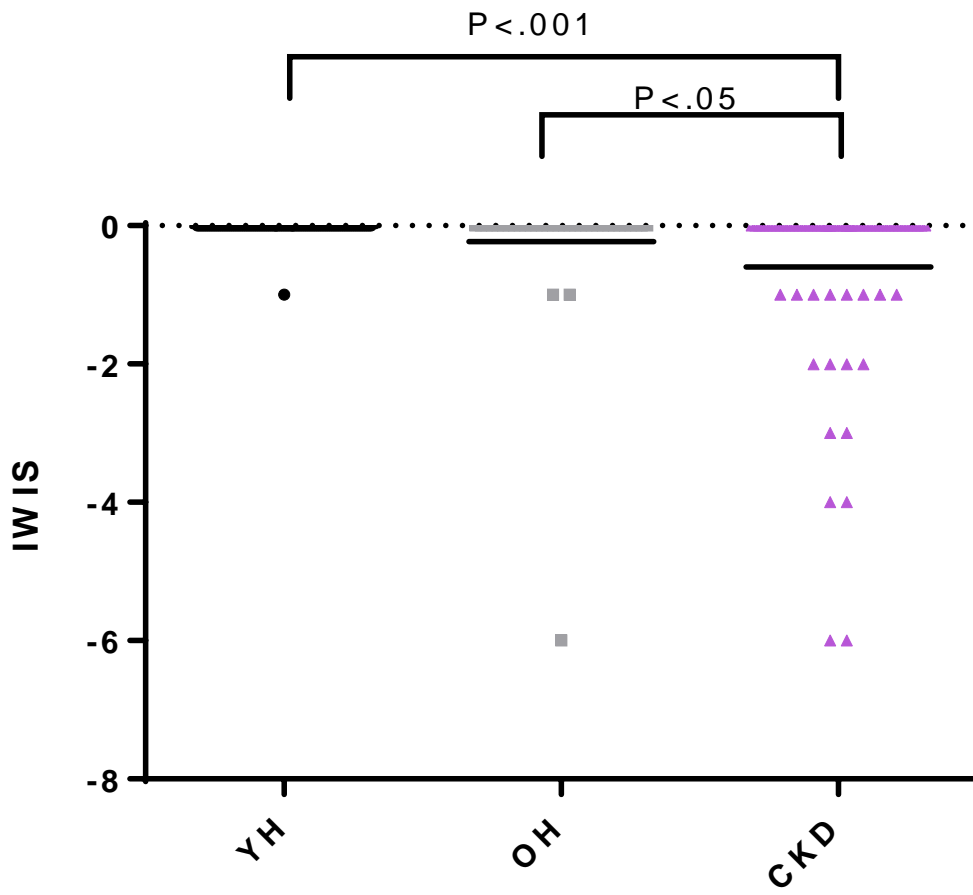

# EQ 4 - Liking food

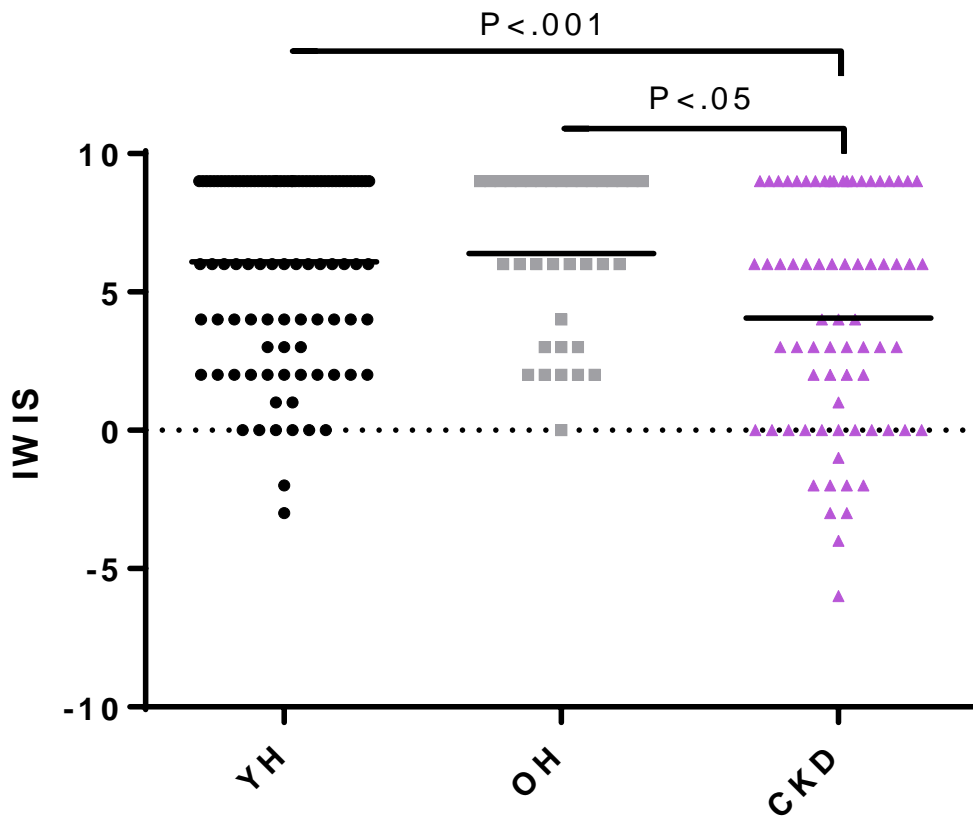

# EQ5 - Appetite

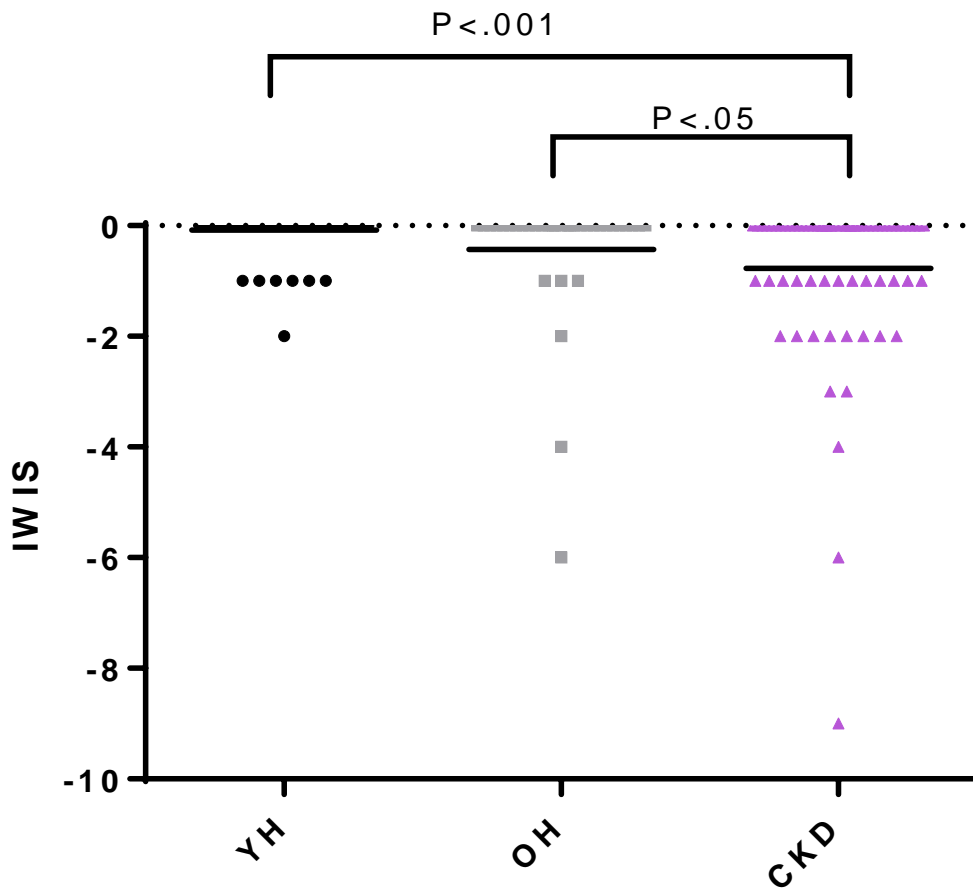

# EQ 6 - Difficulties eating

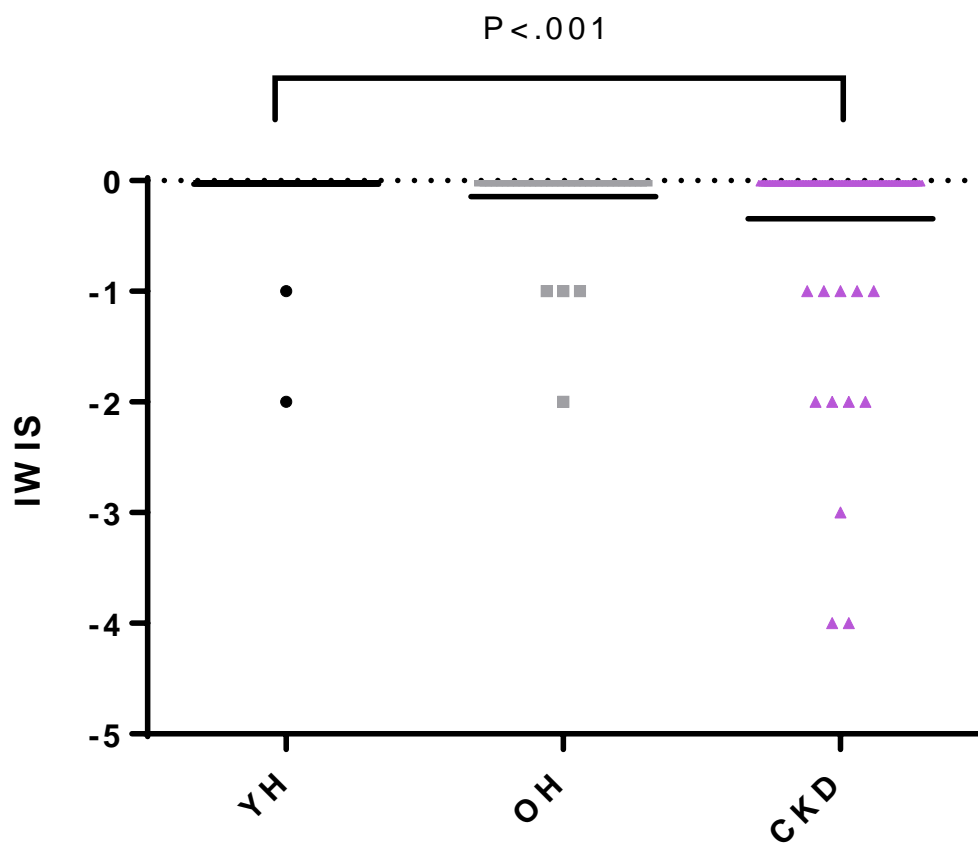







### BQ3 - Interactivity

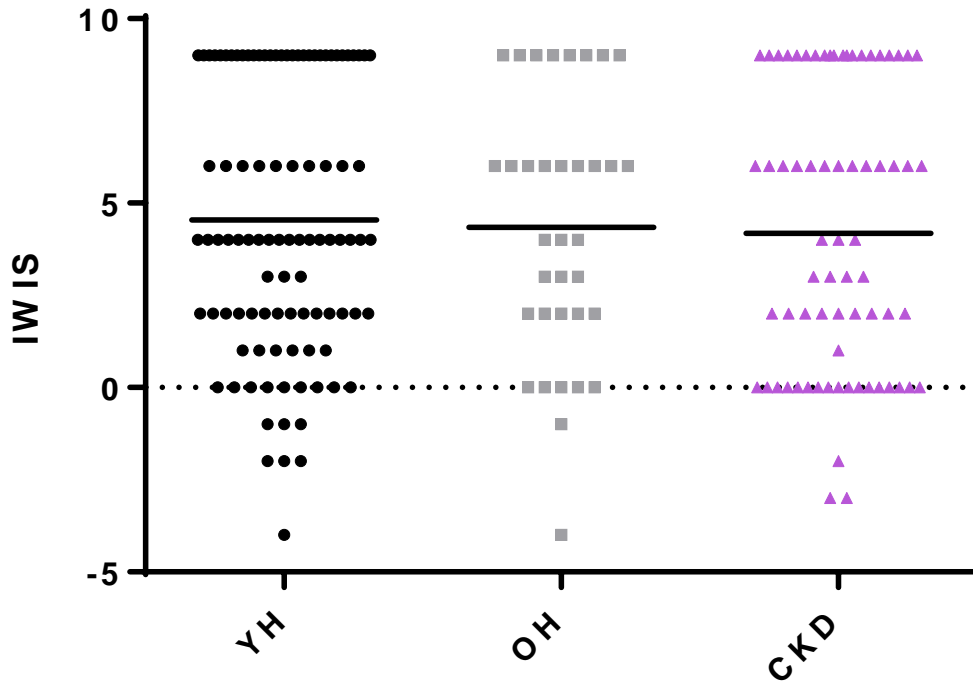

# BQ 4 - Playing

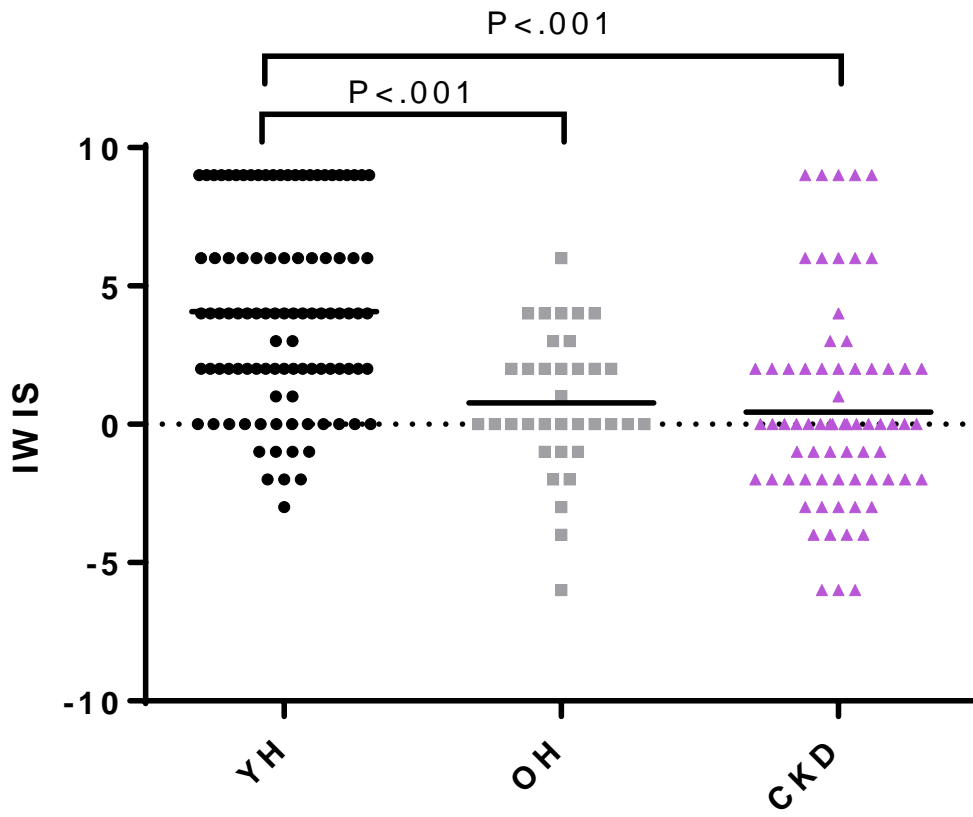

# BQ5 - Hunting

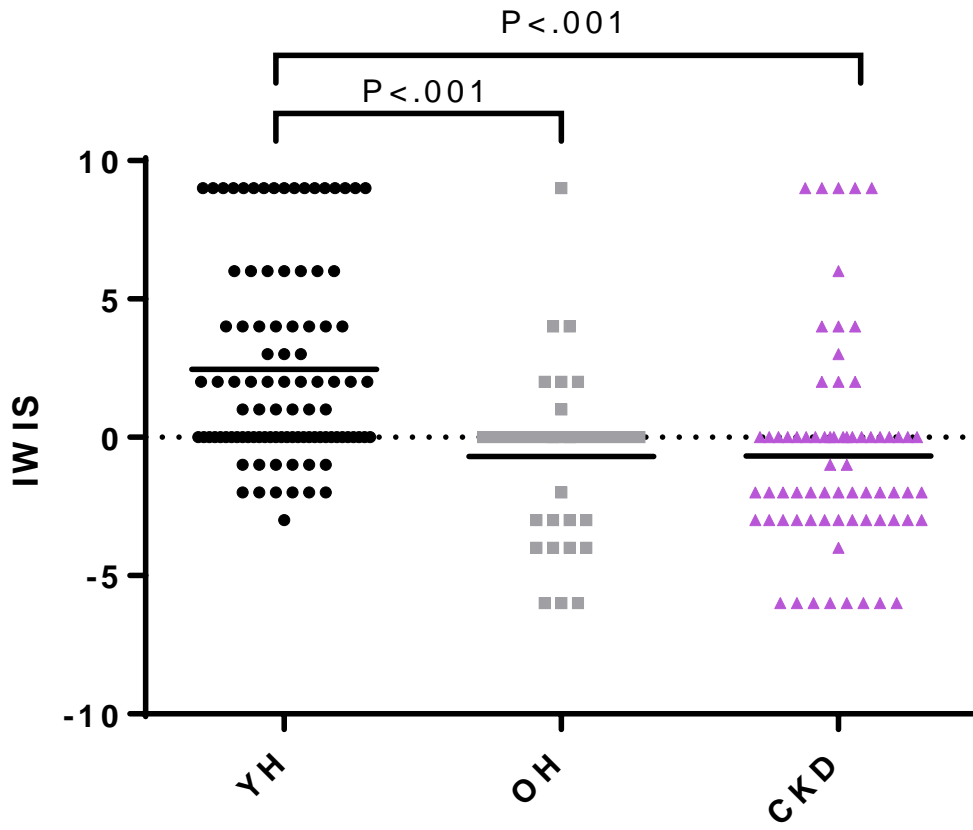

# BQ6 - Grooming

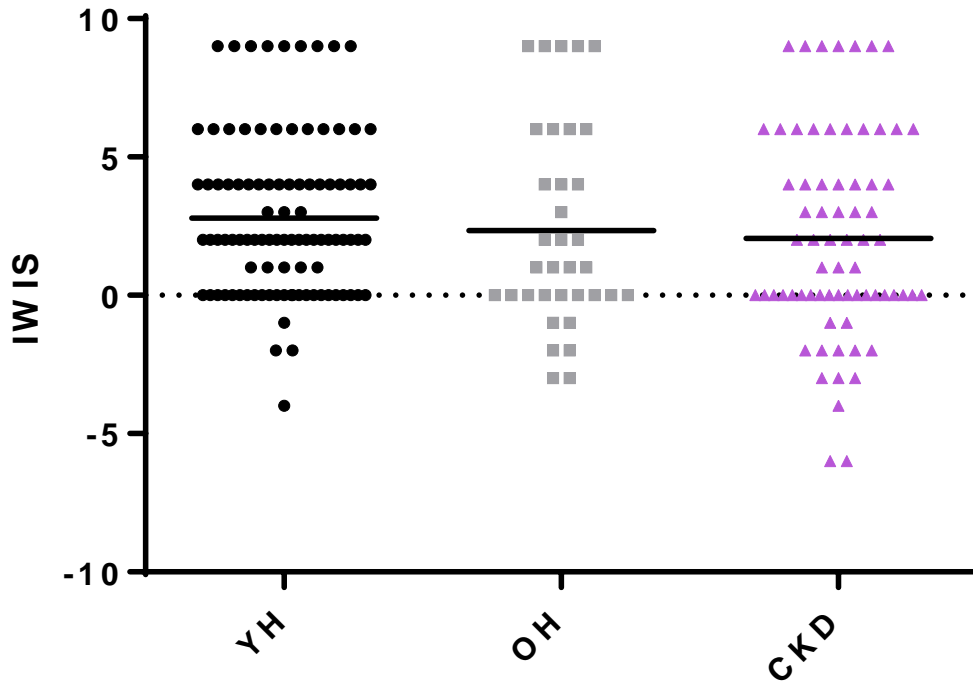

# BQ7 - Scratching

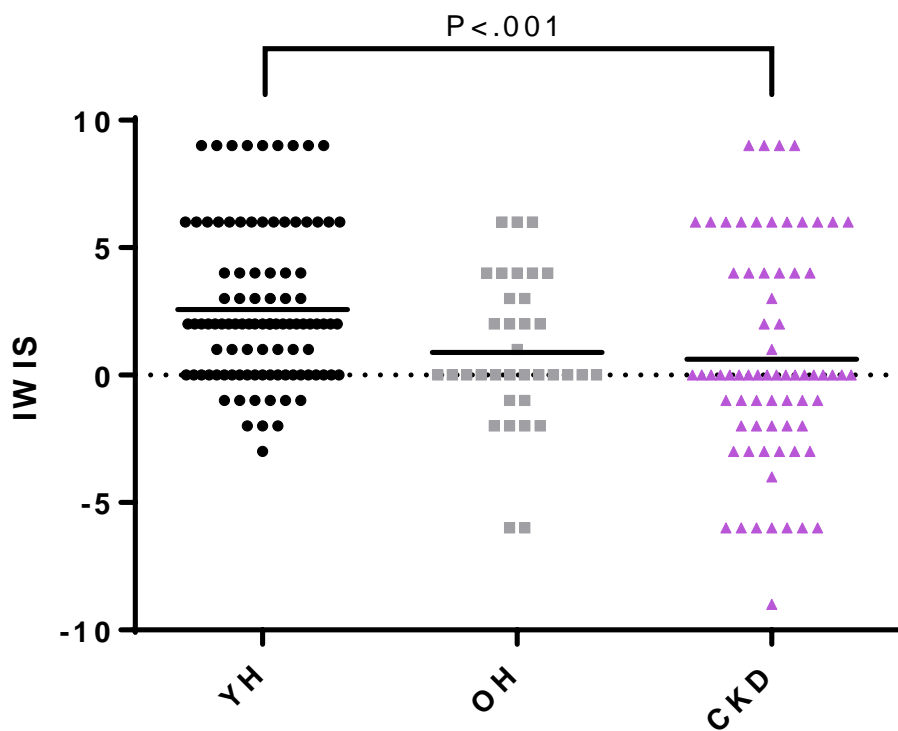

# MQ1 - Going to the vets

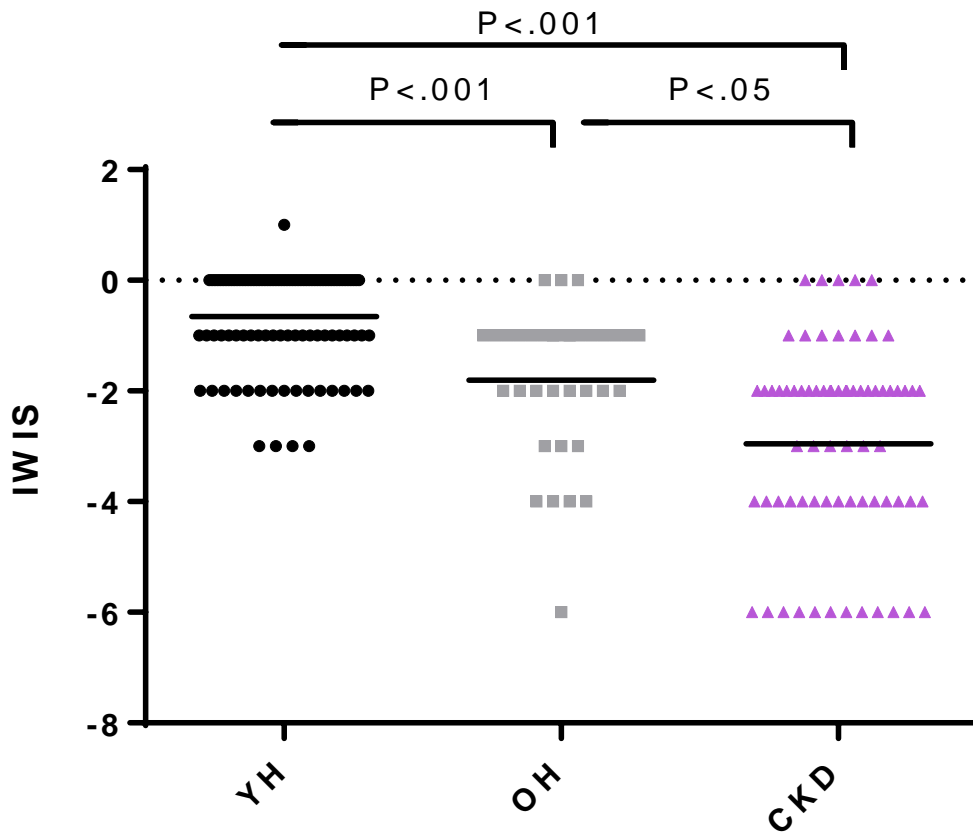

### M Q 3 - Medications

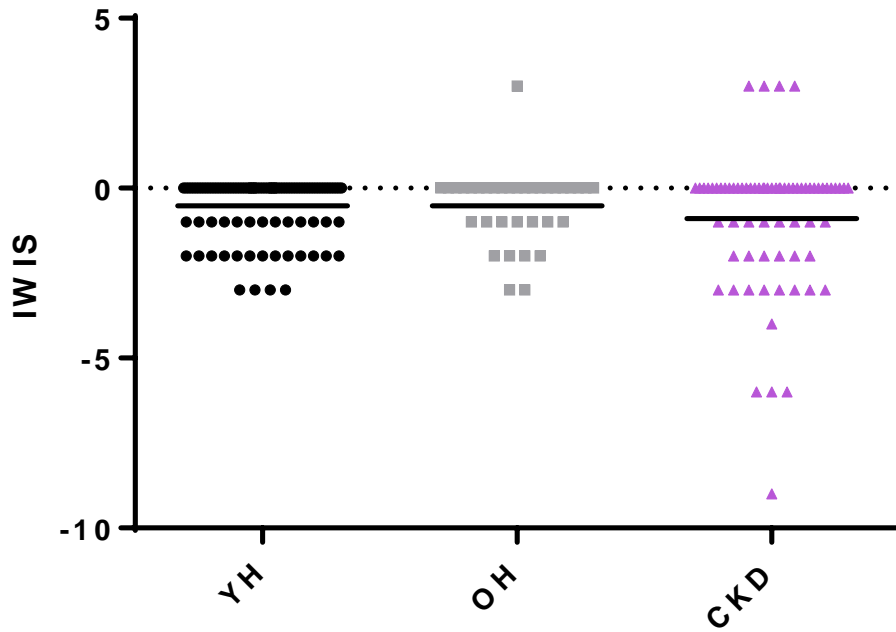

YH = young healthy cats (<9 years) ; OH = old healthy cats ( $\geq 9$  years); CKD = cats diagnosed with chronic kidney disease (plasma creatinine concentration  $\geq 2.0$  mg/dL and USG < 1.035). Significant differences are presented in the graphs.
